# Supplementary material for: Carbohydrate-appended photocytotoxic (imidazophenanthroline)-oxovanadium(iv) complexes for cellular targeting and imaging
Source: Royal Society of Chemistry journal article supplement (doi:10.1039/c3dt52087k), 2013-10-16
Supplement: c3dt52087k.pdf [file c3dt52087k.pdf]

**Carbohydrate-appended photocytotoxic (imidazophenanthroline)-  
oxovanadium(IV) complexes for cellular targeting and imaging**

**Bhabatosh Banik,<sup>a</sup> Kumar Somyajit,<sup>b</sup> Akhtar Hussain,<sup>a</sup> Ganesh Nagaraju,<sup>\*b</sup> and Akhil  
R. Chakravarty<sup>\*a</sup>**

**Supporting Information**

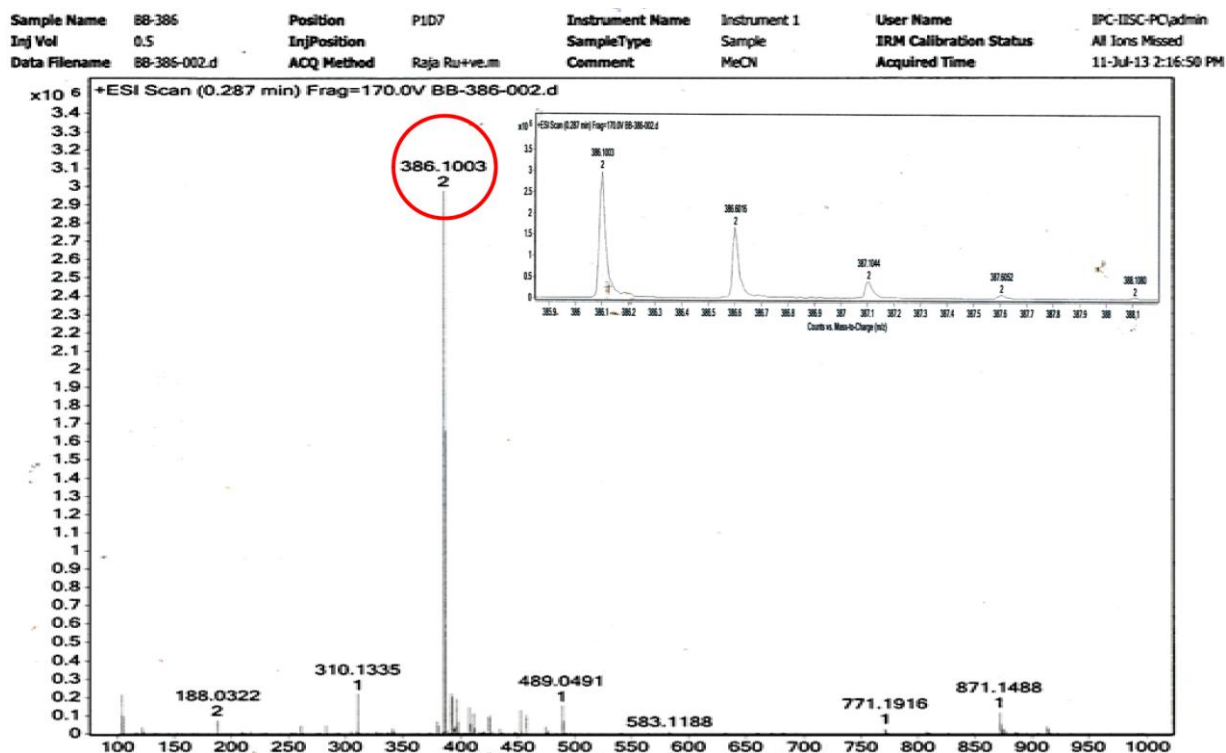

**Fig. S1.** The ESI-MS spectrum of complex **1** in MeCN showing the peak at 386.1003 that corresponds to  $[M]^{2+}$ . The inset shows the isotopic distribution of the  $[M]^{2+}$  ion peak.

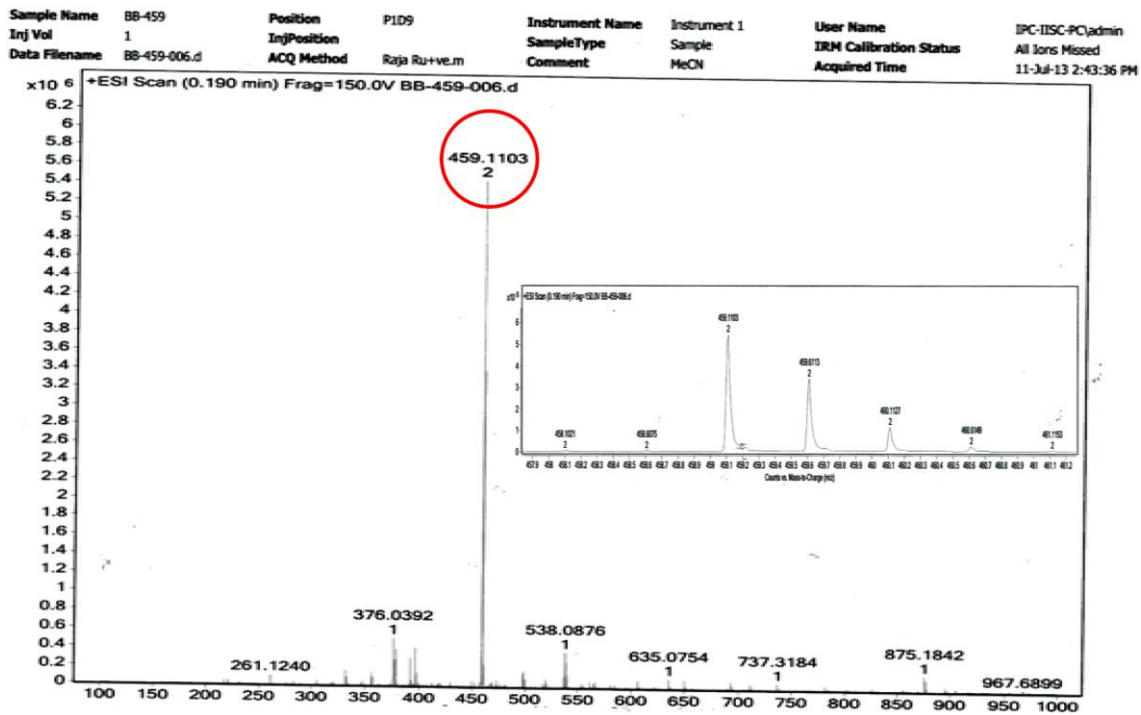

**Fig. S2.** The ESI-MS spectrum of complex **2** in MeCN showing the peak at 459.1103 (m/z) assignable to  $[M]^{2+}$ . The inset shows the isotopic distribution of the  $[M]^{2+}$  ion peak.

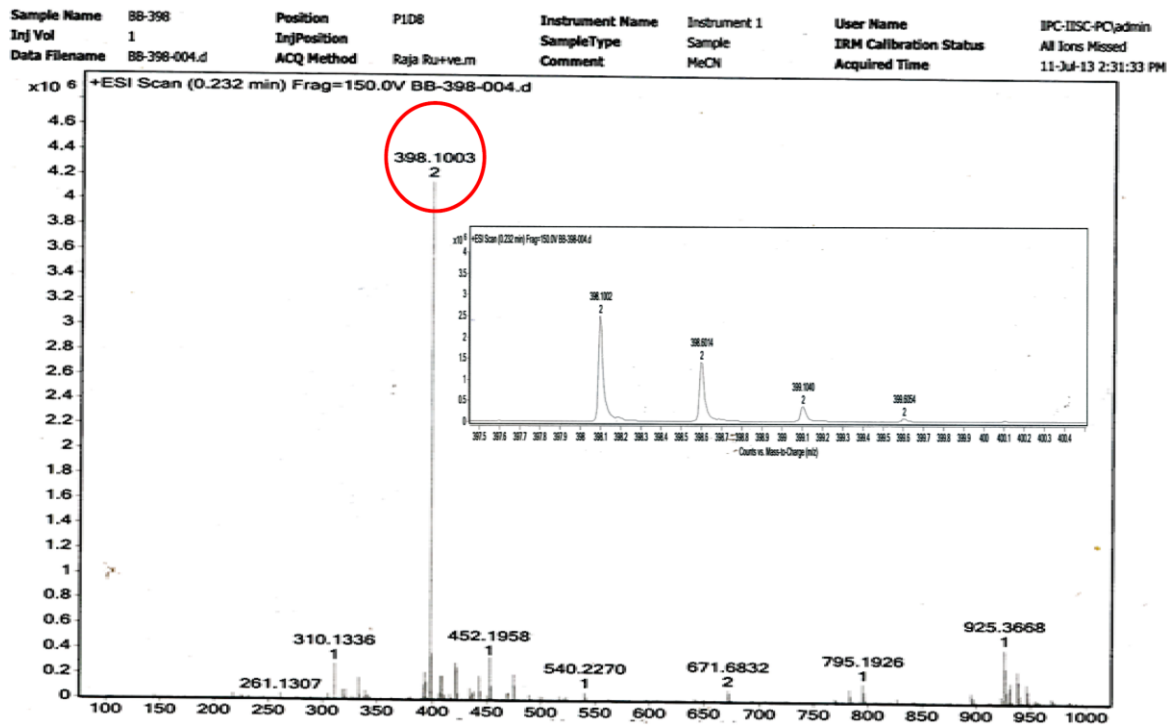

**Fig. S3.** The ESI-MS spectrum of complex **3** in MeCN showing the peak at 398.1003 that corresponds to  $[M]^{2+}$ . The inset shows the isotopic distribution of the  $[M]^{2+}$  ion peak.

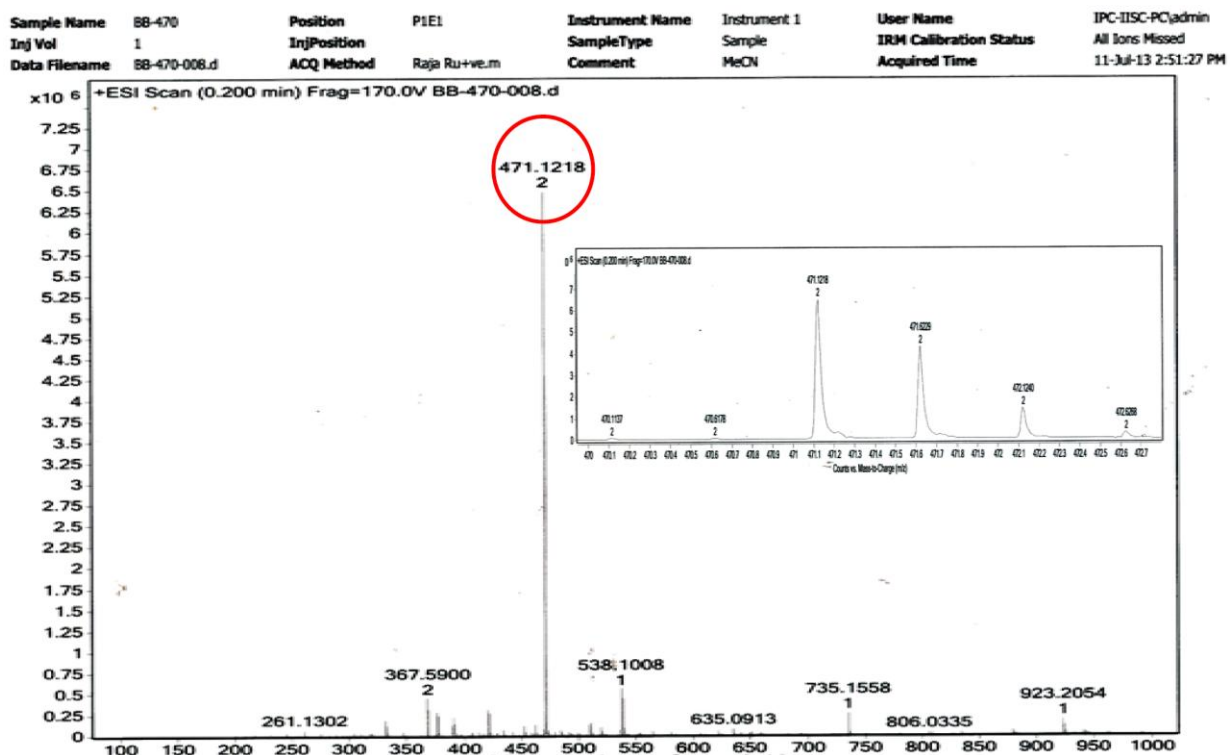

**Fig. S4.** The ESI-MS spectrum of the complex **4** in MeCN showing a peak at 471.1218 that corresponds to  $[M]^{2+}$ . The inset shows the isotopic distribution of the  $[M]^{2+}$  ion peak.

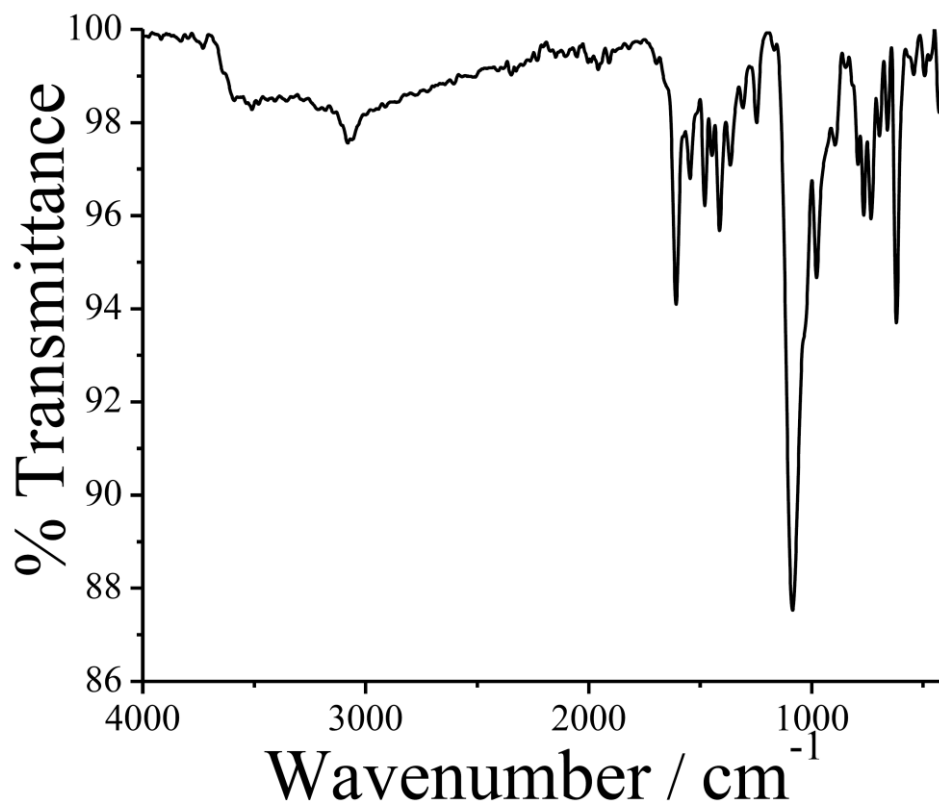

**Fig. S5.** IR spectra of complex 1.

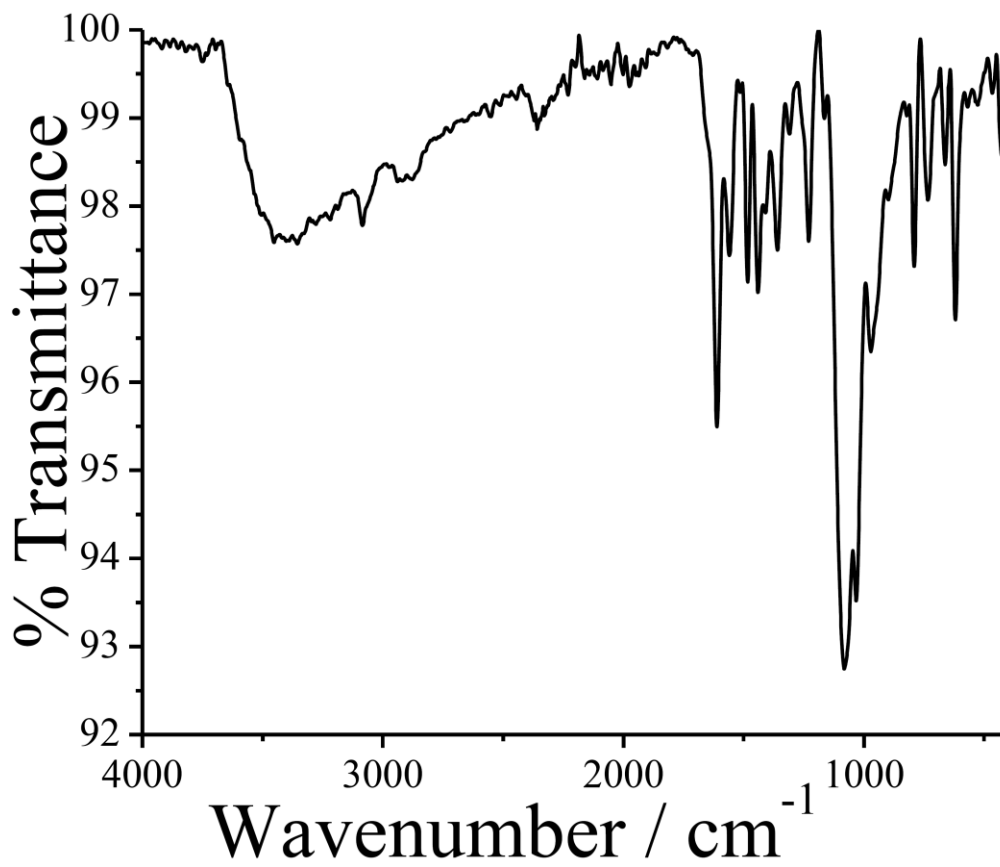

**Fig. S6.** IR spectra of complex 2.

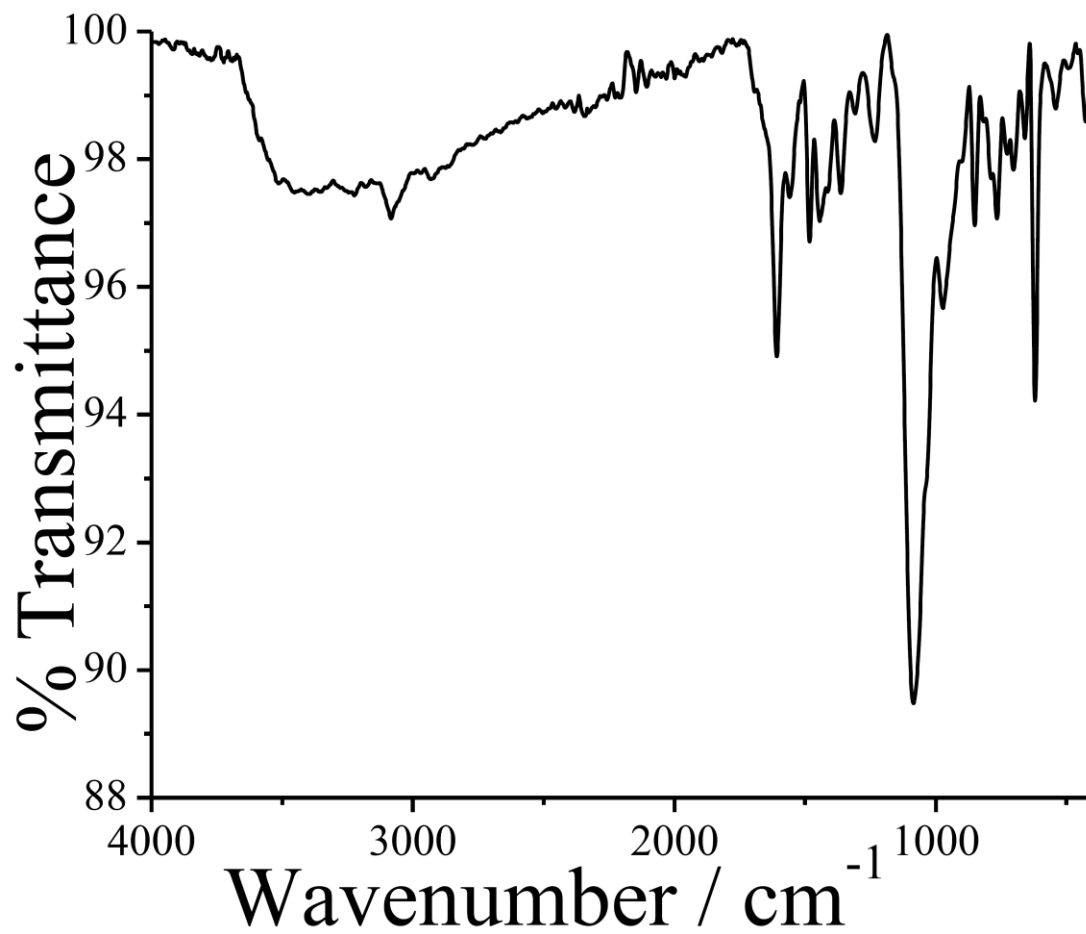

**Fig. S7.** IR spectra of complex 3.



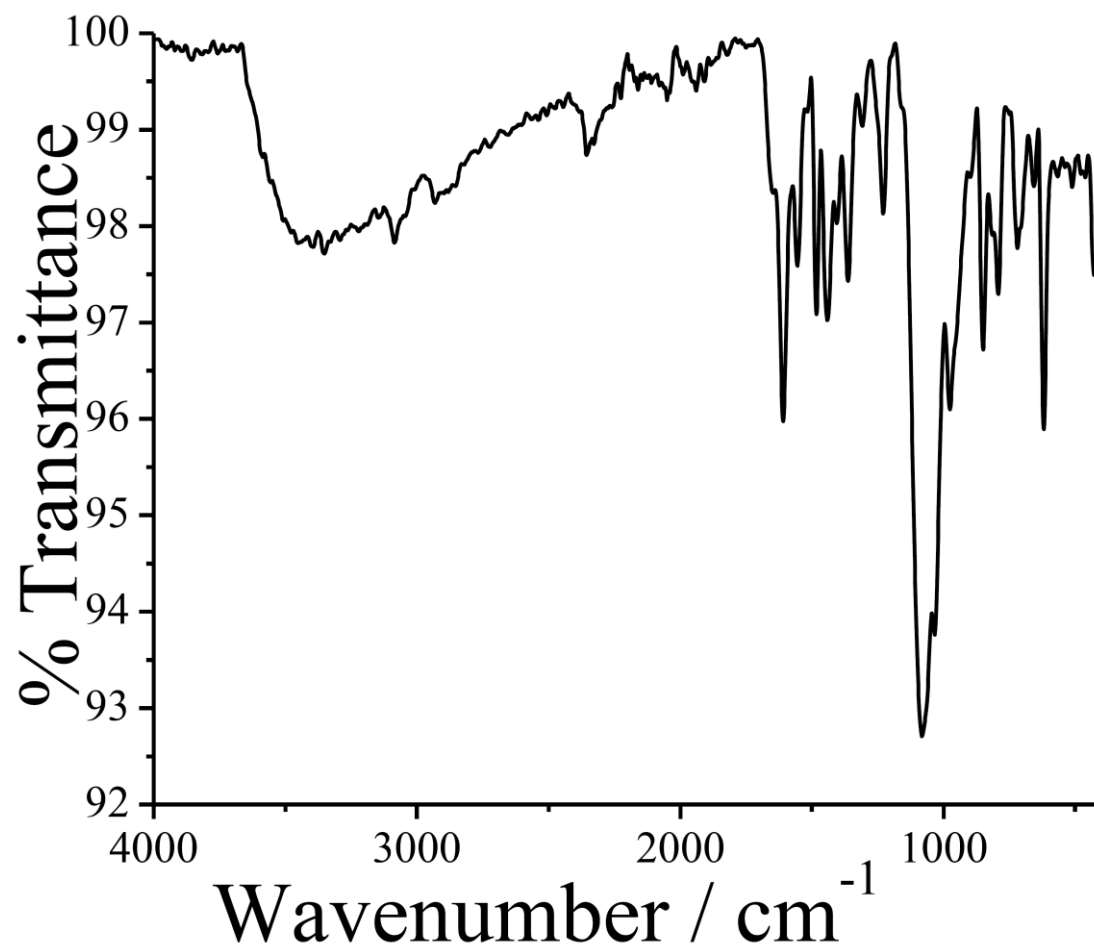

**Fig. S8.** IR spectra of complex 4.

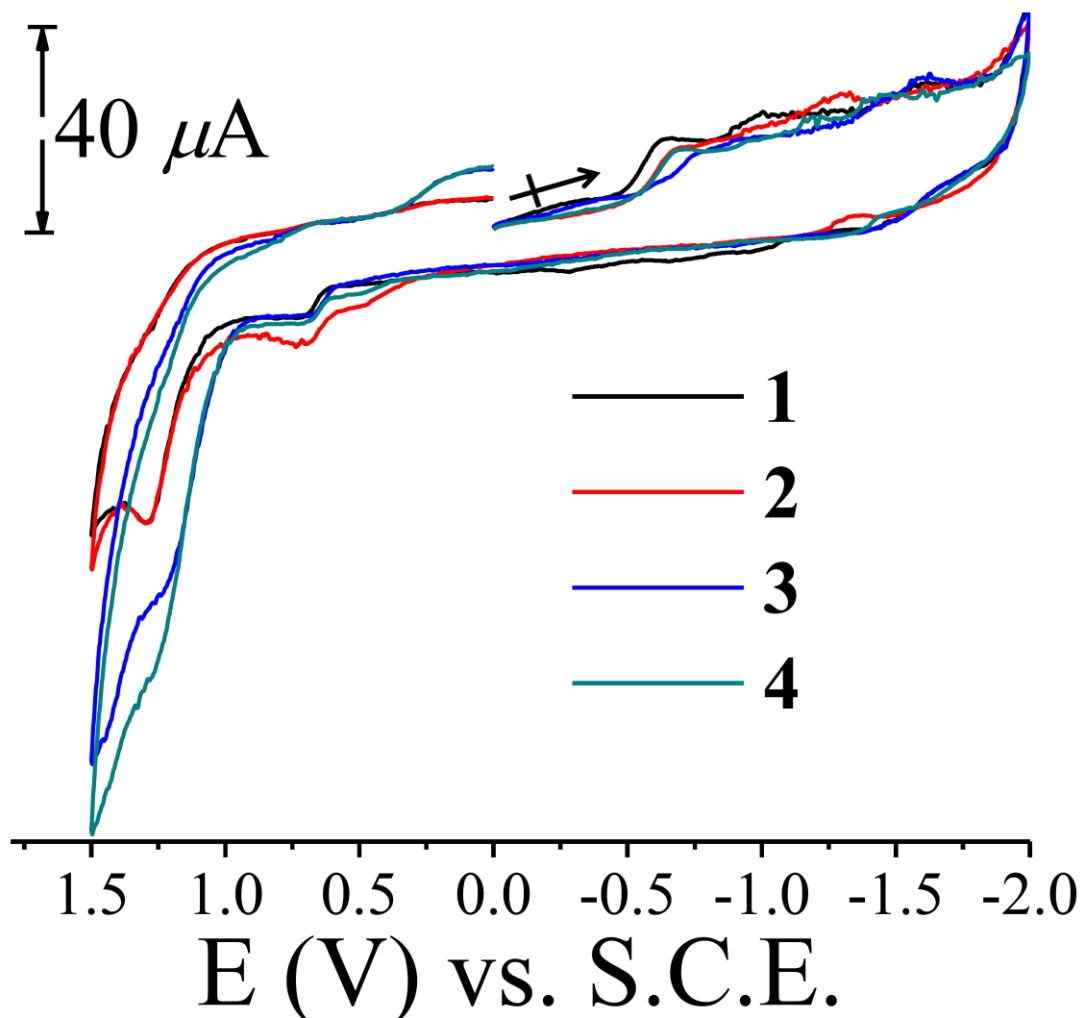

**Fig. S9.** Cyclic voltammograms of the complexes **1** - **4** in DMF at a scan speed of  $50 \text{ mV s}^{-1}$  and  $0.1 \text{ M TBAP}$  as a supporting electrolyte. The V(IV)-V(III) response is irreversible in nature showing only the cathodic peak without having any anodic counterpart.

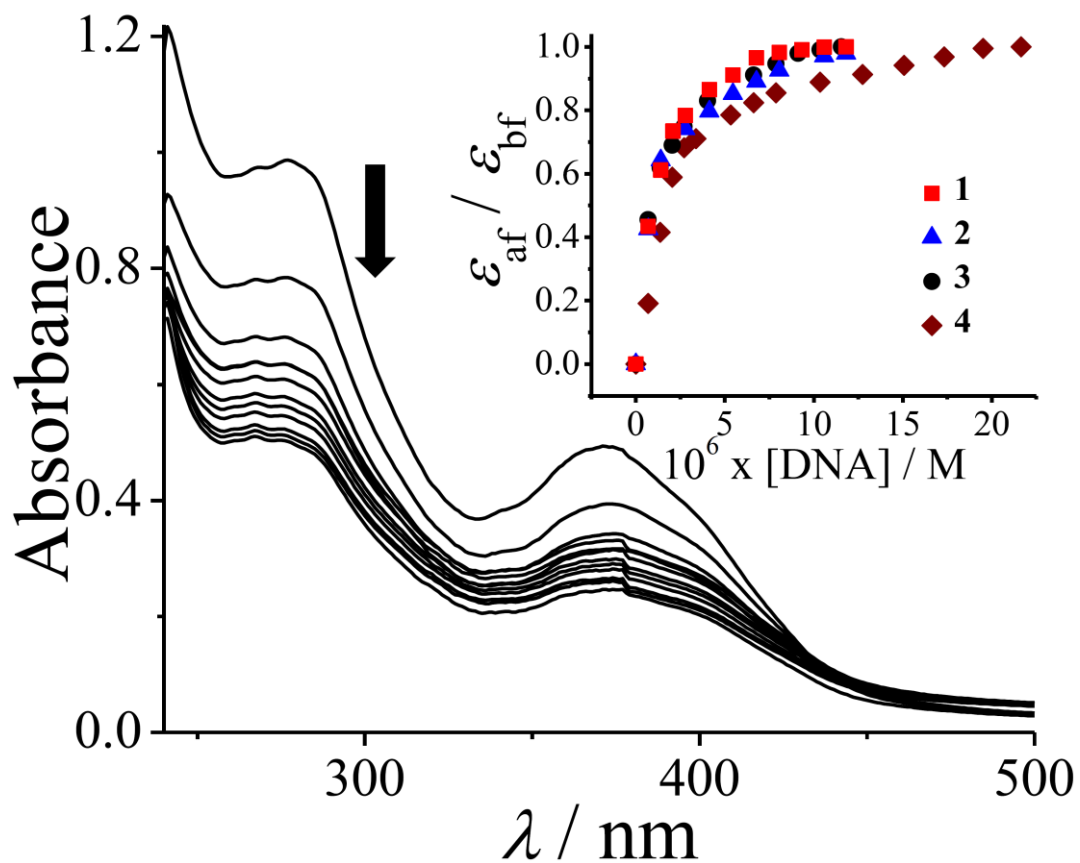

**Fig. S10.** Absorption spectral traces of complex **4** in 5 mM Tris-HCl buffer (pH 7.2) on increasing the concentration of CT DNA. The inset shows the least-squares fit of  $\Delta \epsilon_{af} / \Delta \epsilon_{bf}$  vs. [DNA] for **1** - **4** using the MvH equation.

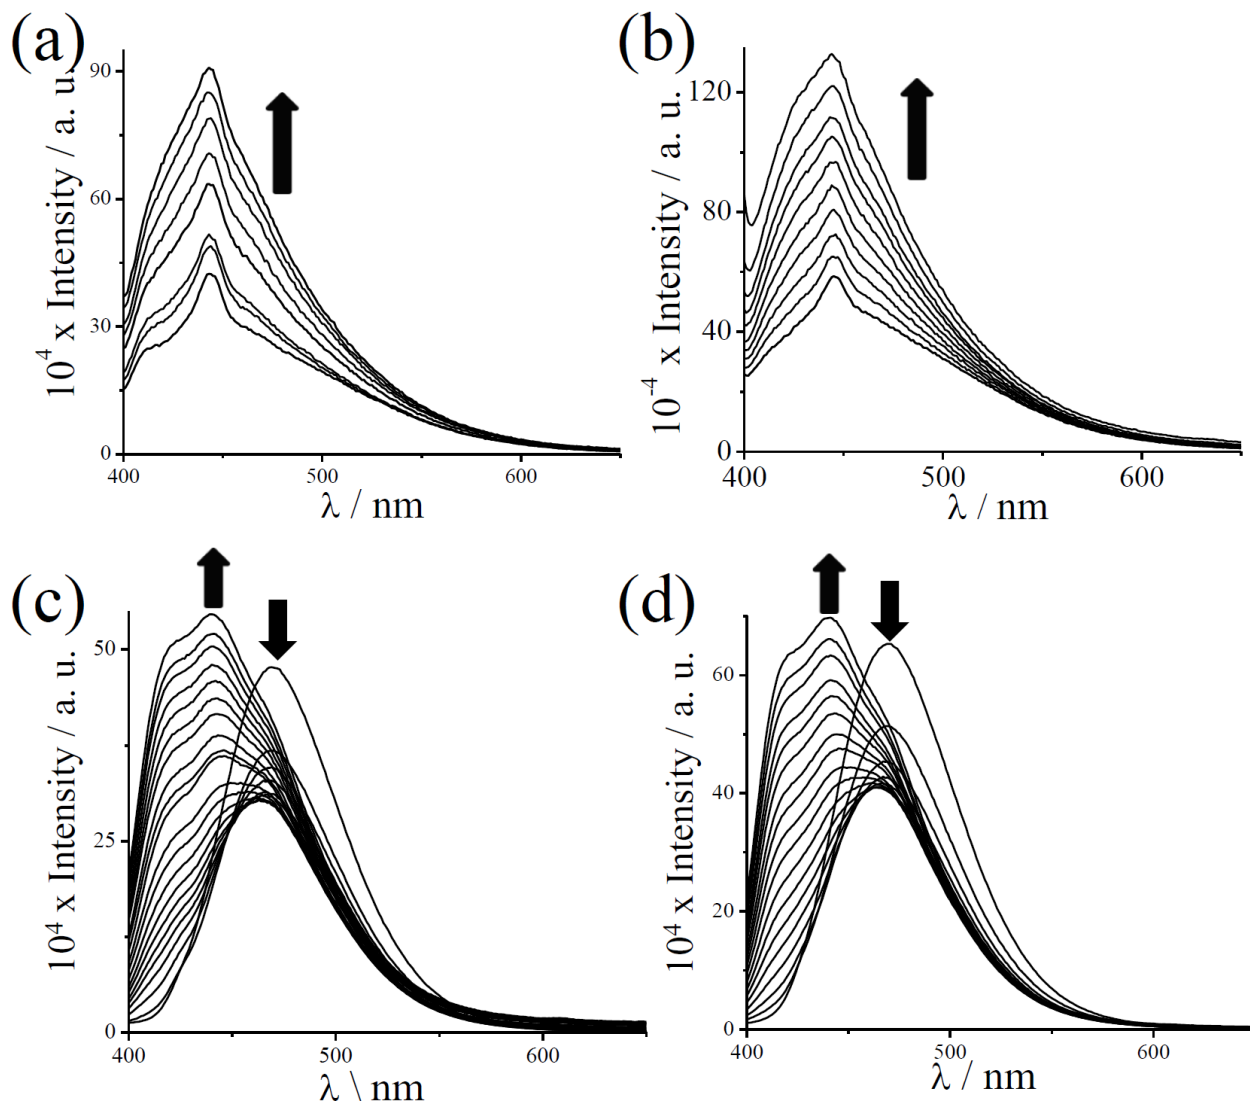

**Fig. S11.** BSA light switch effect of complexes 1 (a), 2 (b), 3 (c) and 4 (d) in 10% aqueous DMSO.

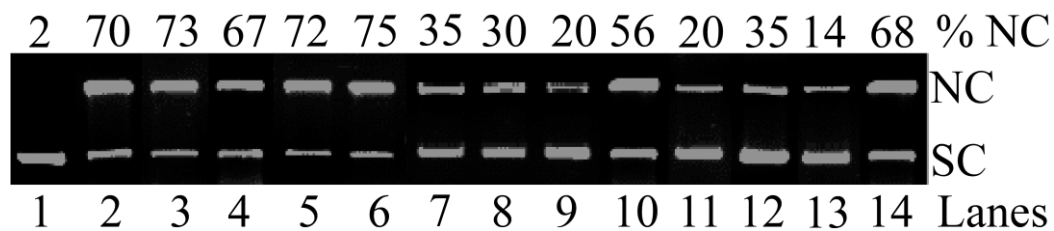

**Fig. S12.** Cleavage of SC pUC19 DNA (0.2  $\mu\text{g}$ , 30  $\mu\text{M}$ ) by the complexes **1-4** (50  $\mu\text{M}$ ) in the presence of various additives in 50 mM Tris-HCl/NaCl buffer (pH 7.2) containing 1.5% DMF on photo-irradiation at 705 nm for 2 h. The reaction conditions are given below in a tabular form.

| Lane No | Reaction conditions                       |
|---------|-------------------------------------------|
| 1       | DNA control                               |
| 2       | DNA + complex <b>4</b>                    |
| 3       | DNA + complex <b>4</b> + D <sub>2</sub> O |
| 4       | DNA + complex <b>4</b> + NaN <sub>3</sub> |
| 5       | DNA + complex <b>4</b> + TEMP             |
| 6       | DNA + complex <b>4</b> + DABCO            |
| 7       | DNA + complex <b>4</b> + DMSO             |
| 8       | DNA + complex <b>4</b> + KI               |
| 9       | DNA + complex <b>4</b> + Catalase         |
| 10      | DNA + complex <b>4</b> + SOD              |
| 11      | DNA + methyl green                        |
| 12      | DNA + methyl green + complex <b>4</b>     |
| 13      | DNA + distamycin-A                        |
| 14      | DNA + distamycin-A + complex <b>4</b>     |

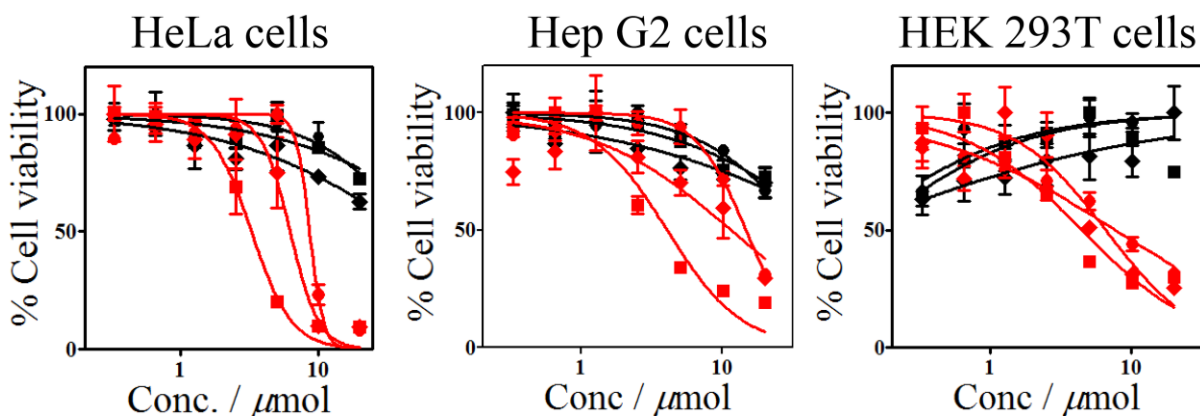

**Fig. S13.** Photocytotoxicity of complexes **1** ( $\blacklozenge$ ), **2** ( $\blacksquare$ ) and **3** ( $\bullet$ ) in HeLa, Hep G2 and HEK 293T cells on 1 h incubation in dark followed by photo-irradiation in visible light (400 to 700 nm) as determined by MTT assay. The traces for photo-exposed and dark-treated cells are shown by red and black curves, respectively.

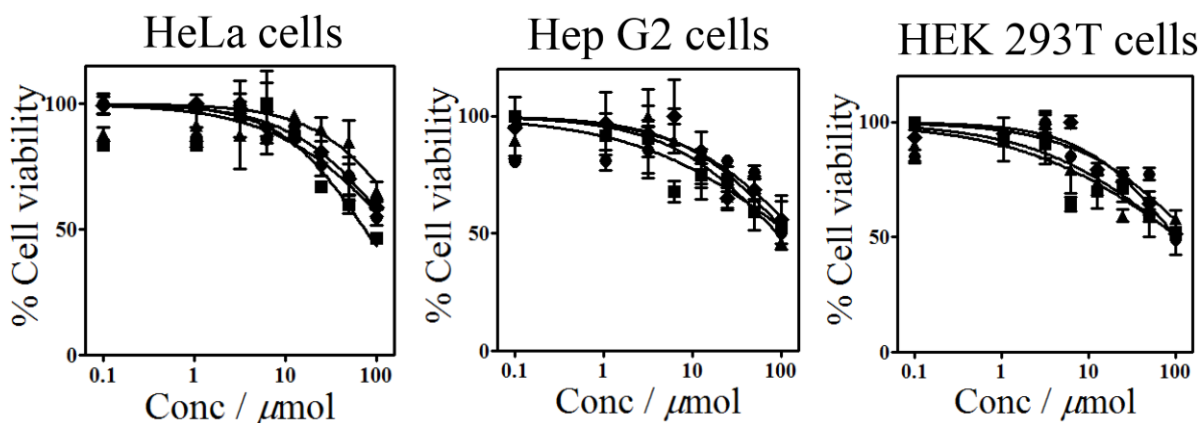

**Fig. S14.** Cytotoxicity of complexes **1** ( $\blacklozenge$ ), **2** ( $\blacksquare$ ), **3** ( $\bullet$ ) and **4** ( $\blacktriangle$ ) (upto 100  $\mu\text{M}$  concentration) in HeLa, Hep G2 and HEK 293T cells on 1 h incubation in dark as determined by MTT assay.

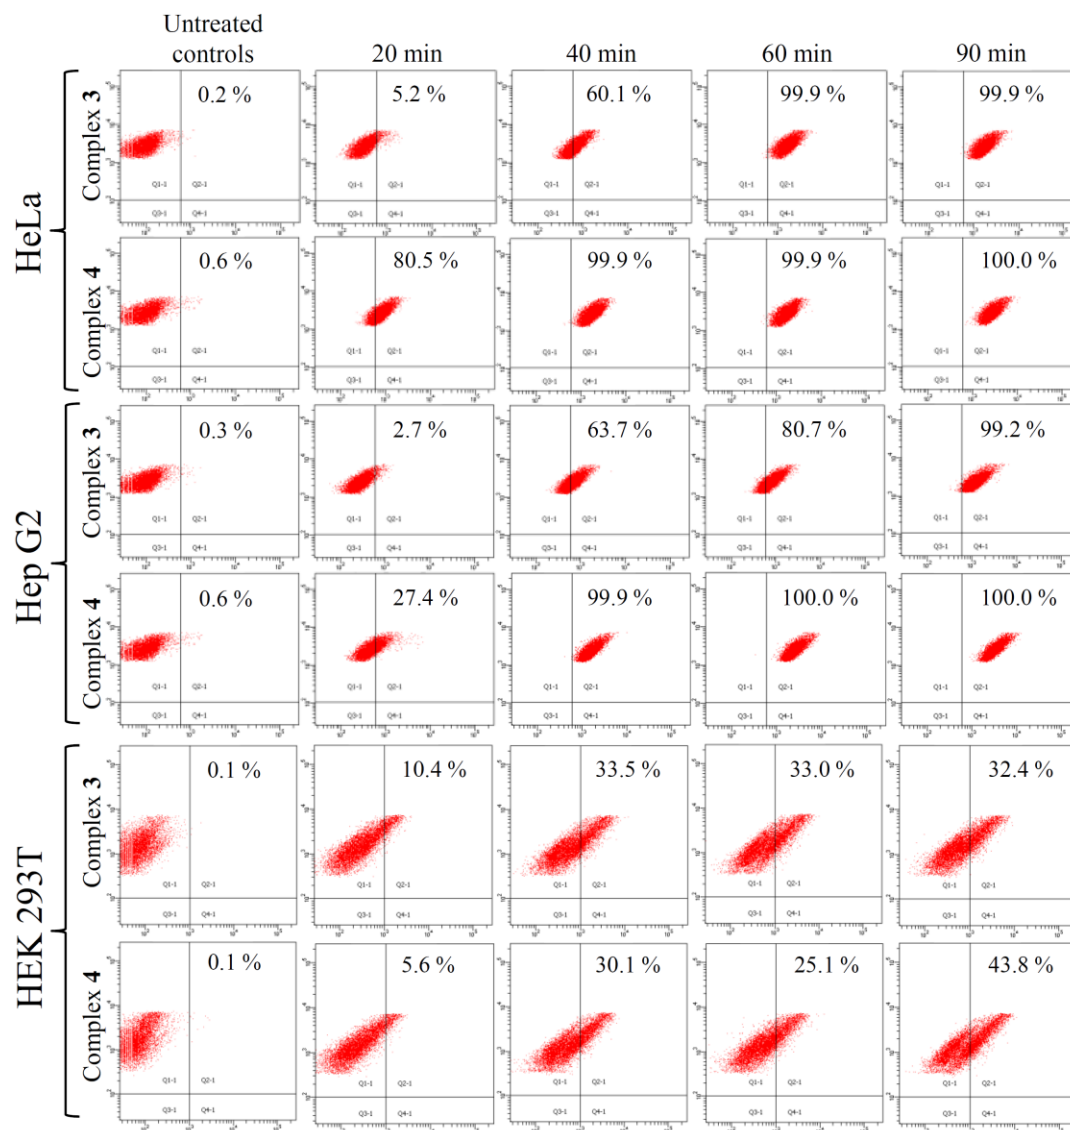

**Fig. S15.** A comparison of the cellular uptake of the complexes **3** and **4** ( $0.2 \mu\text{M}$ ) at various time points of incubation with HeLa, Hep G2 and HEK 293T cells as determined from the flow cytometric analysis.

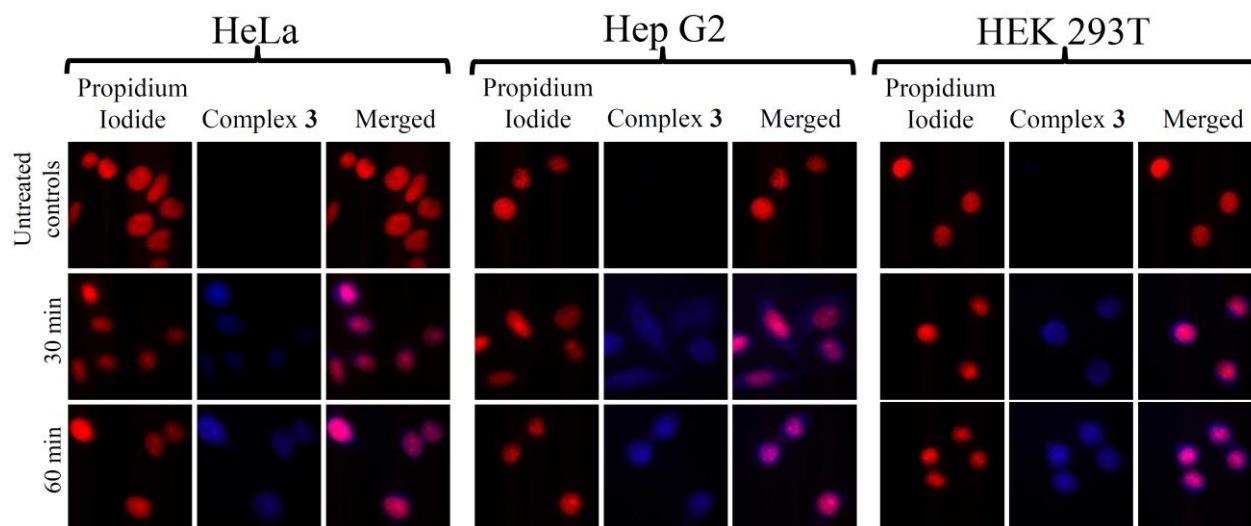

**Fig. S16.** A time-course collection of the fluorescence microscopic images of the HeLa, Hep G2 and HEK 293T cells treated with complex **3** (1  $\mu$ M).



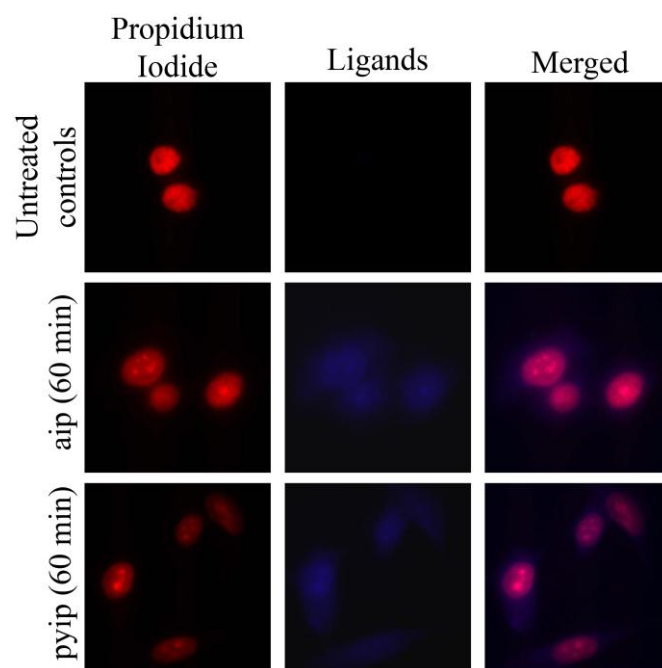

**Fig. S17.** Fluorescence microscopic images of the HeLa cells treated with the ligands, viz. aip and pyip (5  $\mu$ M).

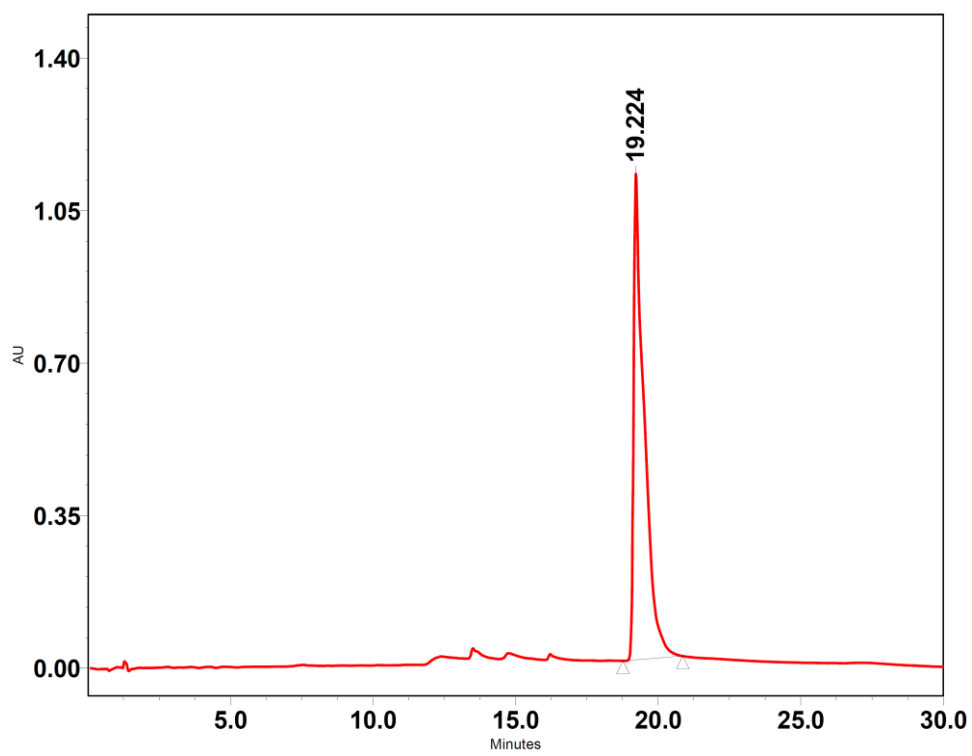

**Fig. S18.** HPLC chromatogram of the complex **1**.

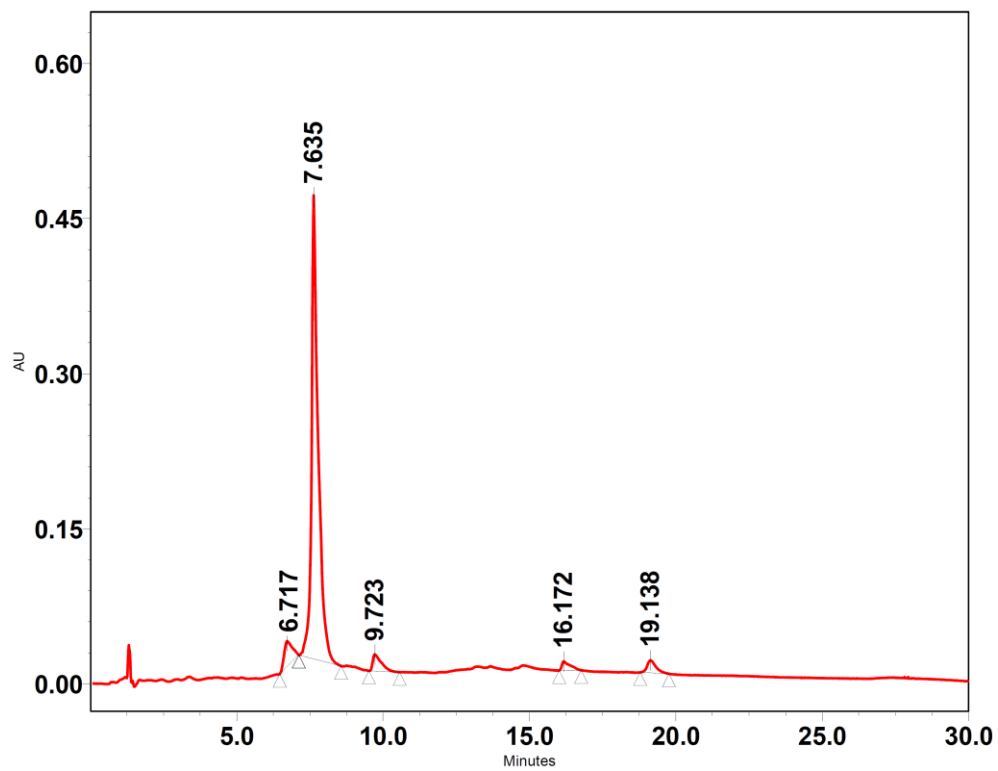

**Fig. S19.** HPLC chromatogram of the complex 2.

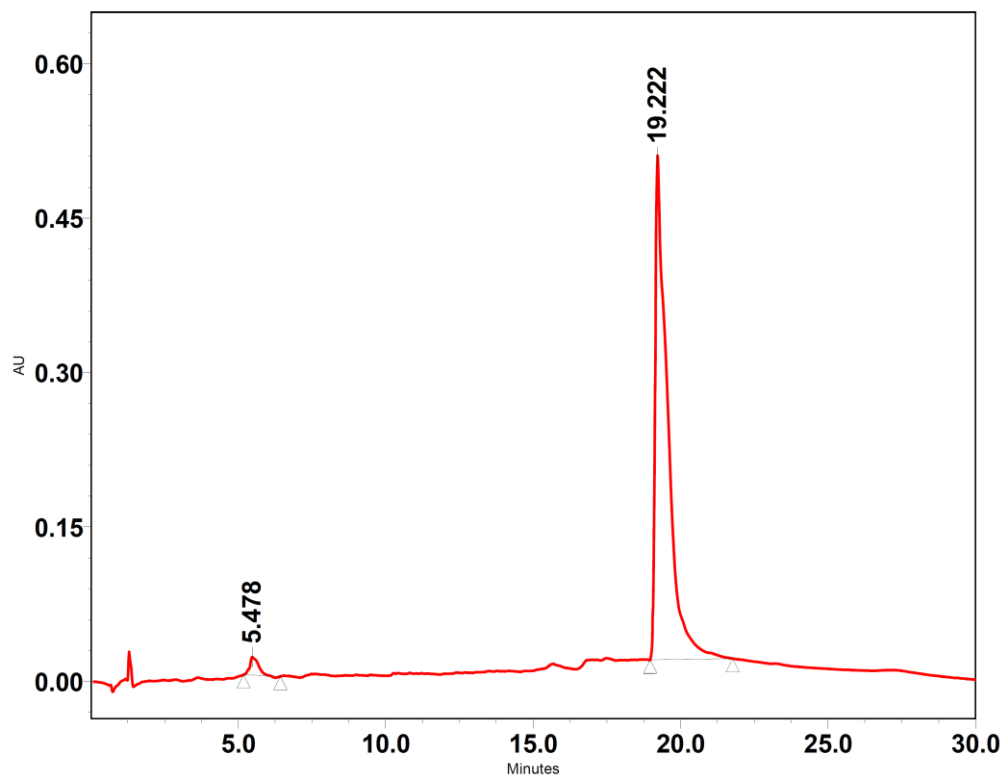

**Fig. S20.** HPLC chromatogram of the complex **3**.

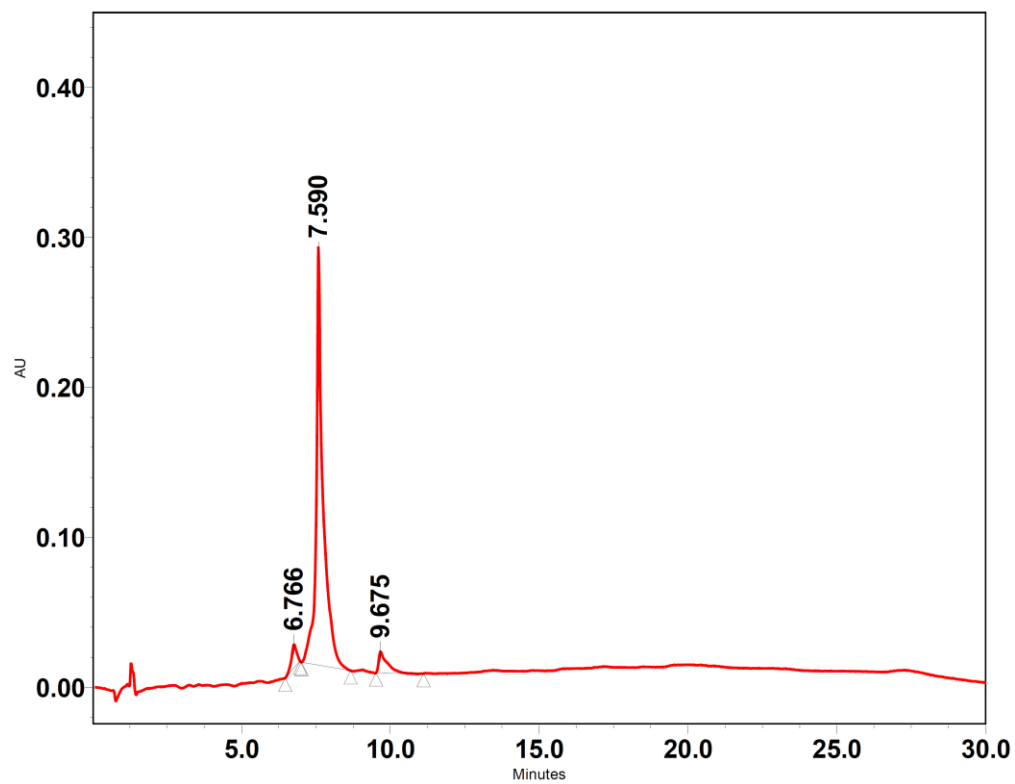

**Fig. S21.** HPLC chromatogram of the complex 4.
